# Supplementary material for: Outcomes after primary and repeat thermal ablation of hepatocellular carcinoma with or without liver transplantation
Source: Springer Nature journal article supplement (doi:10.1007/s00330-021-08515-3), 2022-02-08
Supplement: MOESM1 [file 20114066]

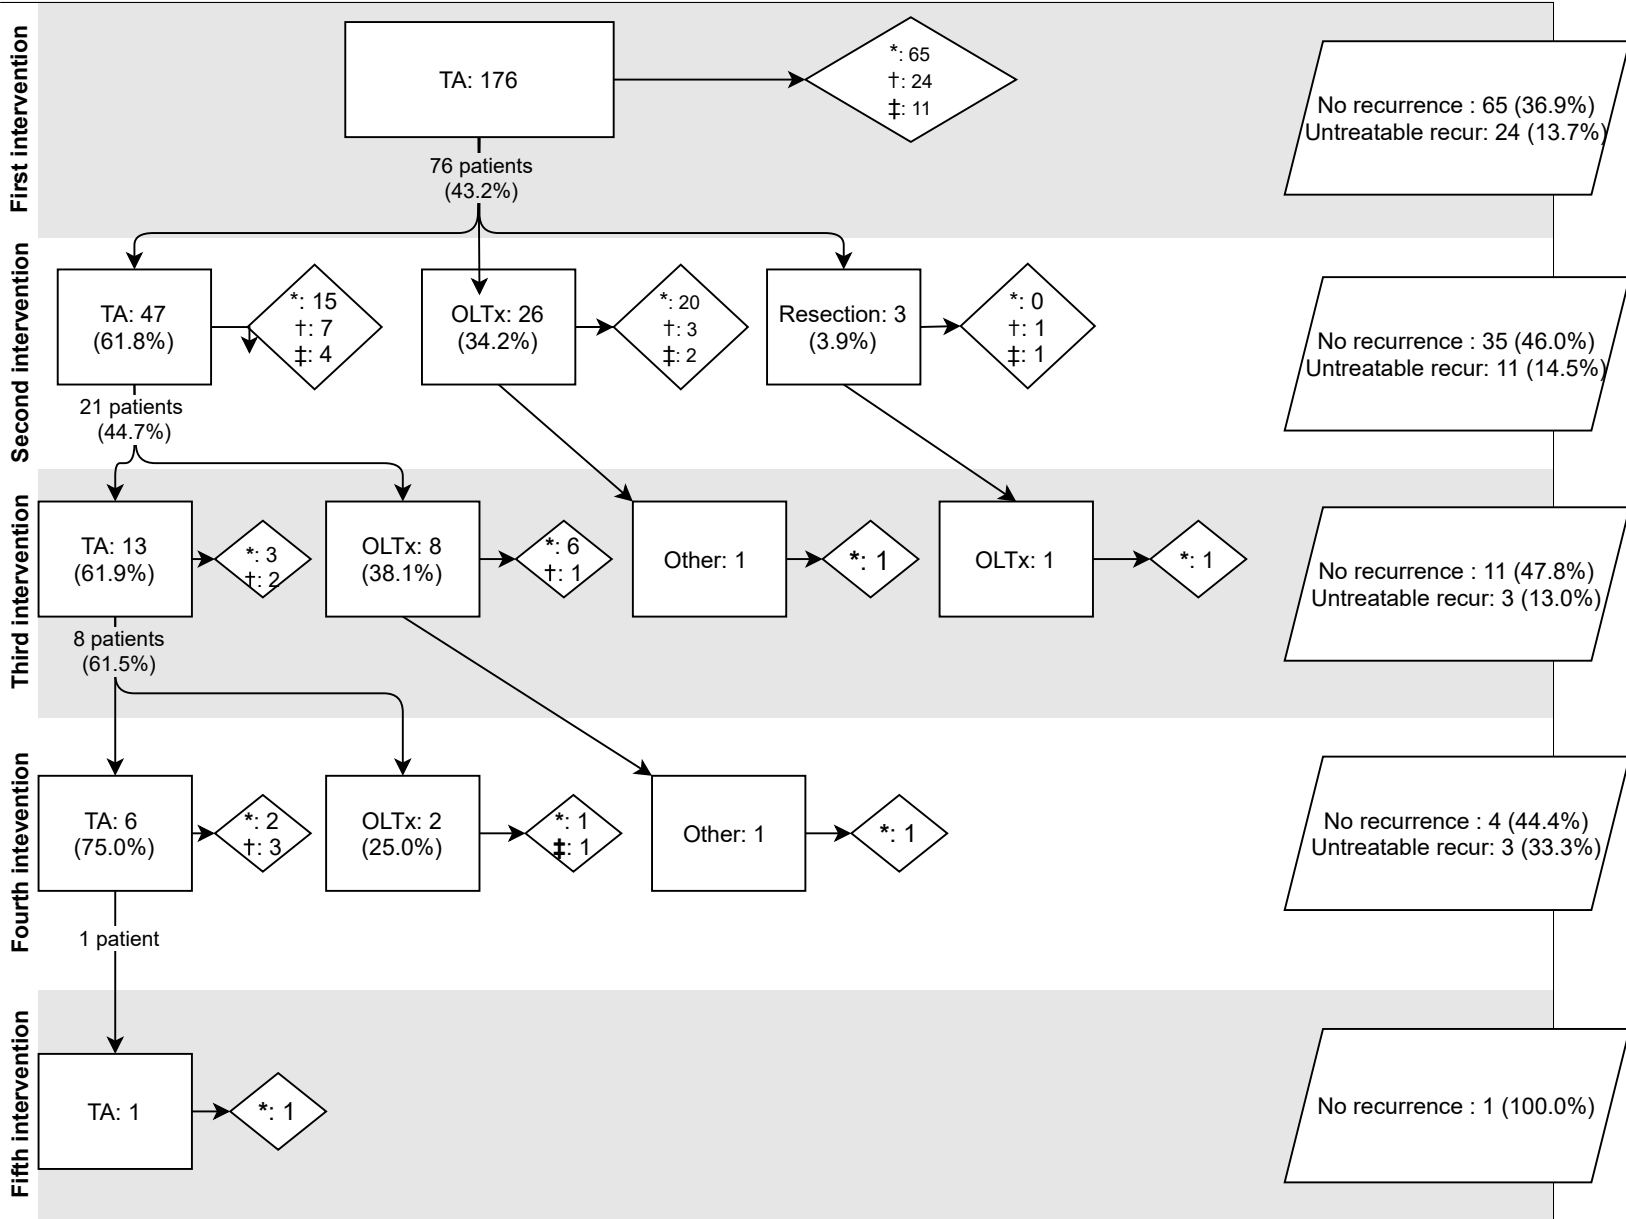

\*: No recurrence detected during follow-up  
 †: Untreatable recurrence, no curative options  
 ‡: Died from non-HCC cause <6 months
